# Supplementary material for: Hydrolytically degradable poly(β-thioether ester ketal) thermosets via radical-mediated thiol–ene photopolymerization
Source: Royal Society of Chemistry journal article supplement (doi:10.1039/c9py01082c), 2019-01-01
Supplement: c9py01082c1.pdf [file c9py01082c1.pdf]

## Supplementary Information

### Hydrolytically Degradable Poly( $\beta$ -thioether ester ketal) Thermosets via Radical-Mediated Thiolene Photopolymerization

Benjamin M. Alameda, Travis C. Palmer, Jonathan D. Sisemore, Nicholas G. Pierini, and Derek L. Patton\*

School of Polymer Science and Engineering, The University of Southern Mississippi, Hattiesburg, MS 39402.

Contents of the electronic supplementary document:

1. Monomer **3** Nuclear Magnetic Resonance Characterization
  - S1  $^1\text{H}$ -NMR
  - S2  $^{13}\text{C}$ -NMR
  - S3  $^1\text{H}$  -  $^{13}\text{C}$  HMBC
  - S4 COSY
2. Monomer **5** Nuclear Magnetic Resonance Characterization
  - S5  $^1\text{H}$ -NMR
  - S6  $^{13}\text{C}$ -NMR
  - S7  $^1\text{H}$  -  $^{13}\text{C}$  HMBC
  - S8 COSY
3. Monomer **7** Nuclear Magnetic Resonance Characterization
  - S9  $^1\text{H}$ -NMR
  - S10  $^{13}\text{C}$ -NMR
  - S11  $^1\text{H}$  -  $^{13}\text{C}$  HMBC
  - S12 COSY
4. Monomer **9** Nuclear Magnetic Resonance Characterization
  - S13  $^1\text{H}$ -NMR
  - S14  $^{13}\text{C}$ -NMR
  - S15  $^1\text{H}$  -  $^{13}\text{C}$  HMBC
  - S16 COSY
5. Photopolymerization Kinetics via Real-time FTIR
  - S17 Real-time FTIR – alkene and thiol conversion versus time for monomers 3, 5, 7, and 9.
6. Degradation product analysis of **P9** Thermoset
  - S18  $^1\text{H}$ -NMR of multi-functional alcohol by-product from acidic degradation
  - S19  $^1\text{H}$ -NMR of ketone by-product from acidic degradation
  - S20  $^1\text{H}$ -NMR spectrum of basic degradation by-products
7. Video of thermoset degradation in 1M HCl.

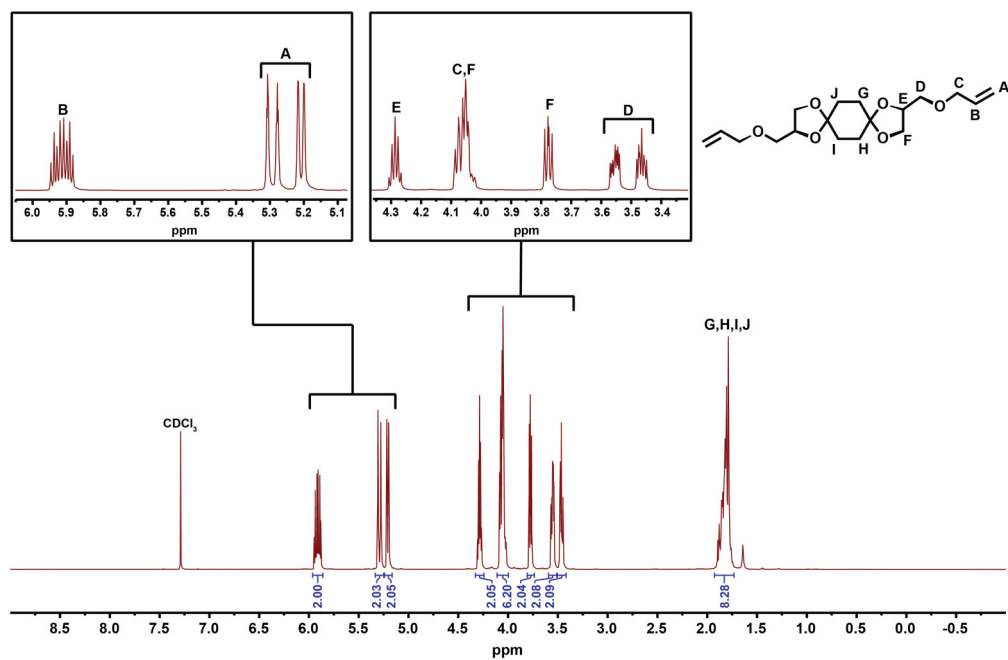

Fig. S1. <sup>1</sup>H-NMR Spectrum of Monomer 3.

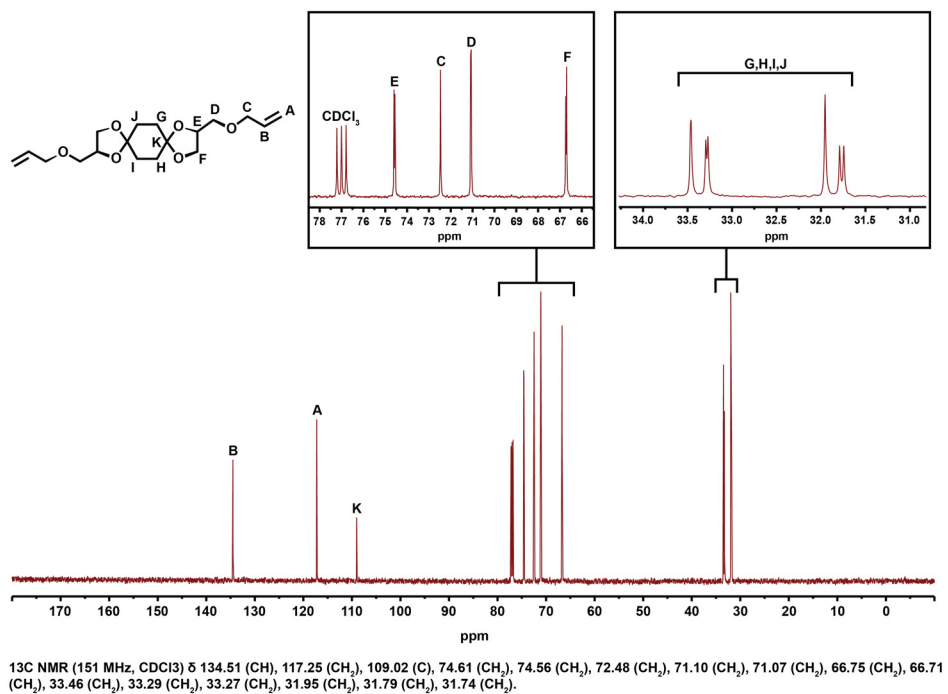

Fig. S2. <sup>13</sup>C-NMR Spectrum of Monomer 3.

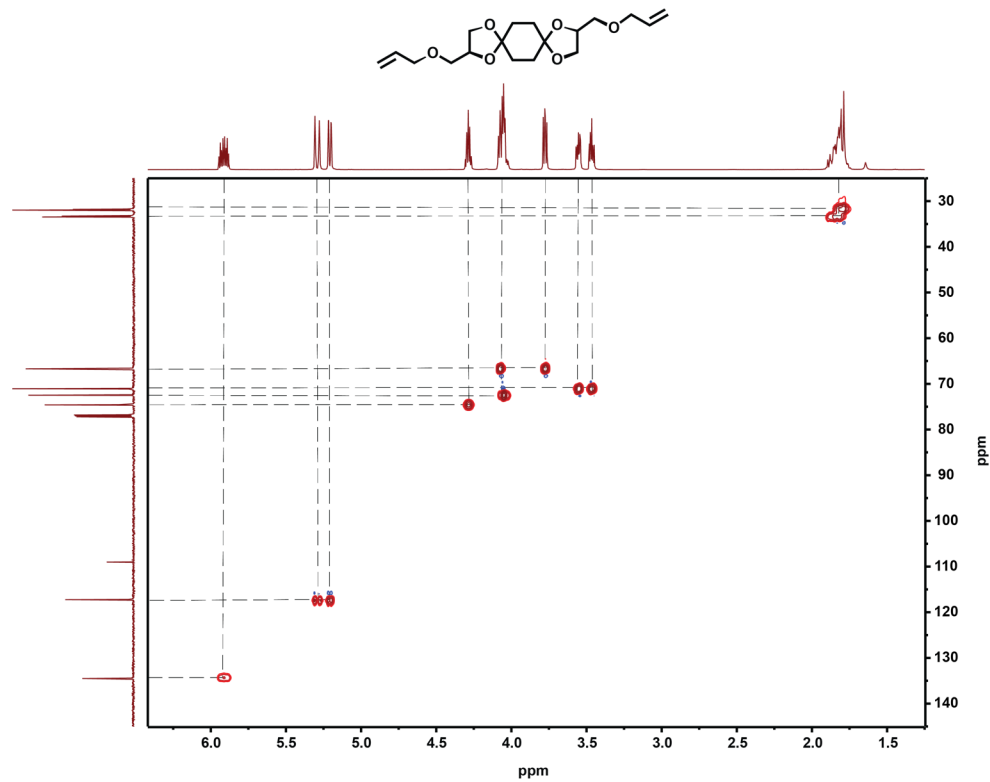

Fig. S3.  $^1\text{H}$  -  $^{13}\text{C}$  HSQC Spectrum of Monomer 3.

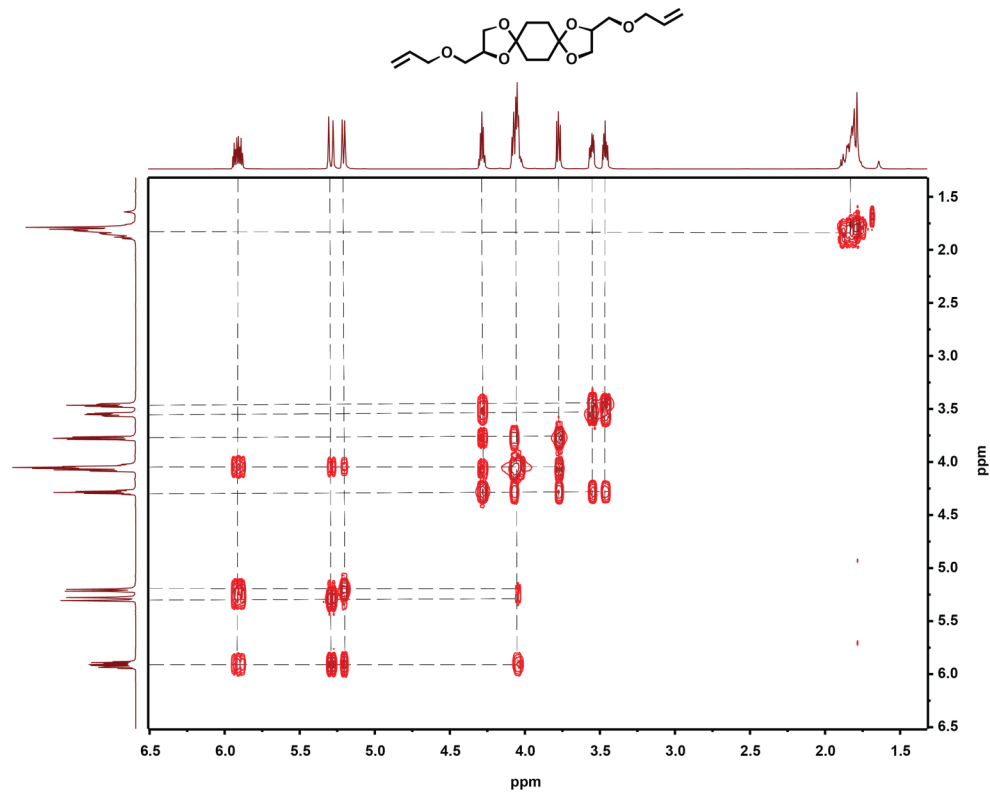

Fig. S4. COSY Spectrum of Monomer 3.

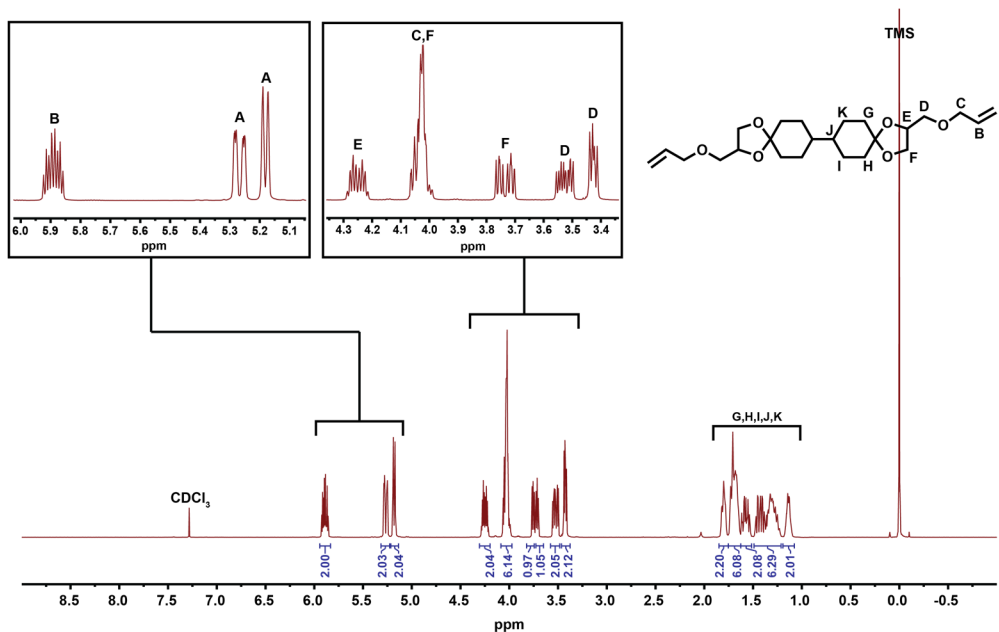

Fig. S5. <sup>1</sup>H-NMR Spectrum of Monomer 5.

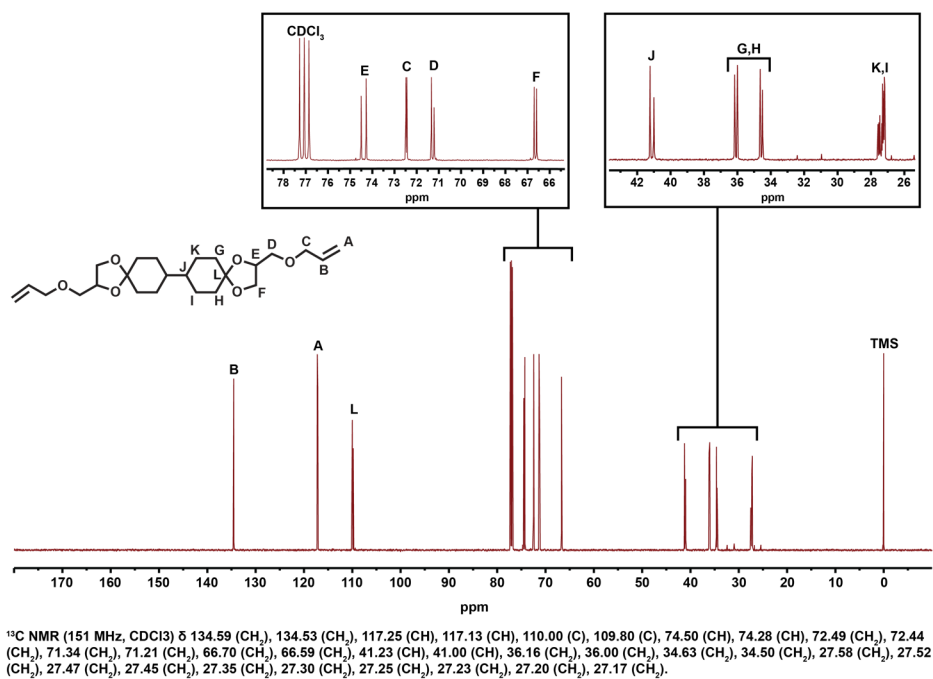

Fig. S6. <sup>13</sup>C-NMR Spectrum of Monomer 5.

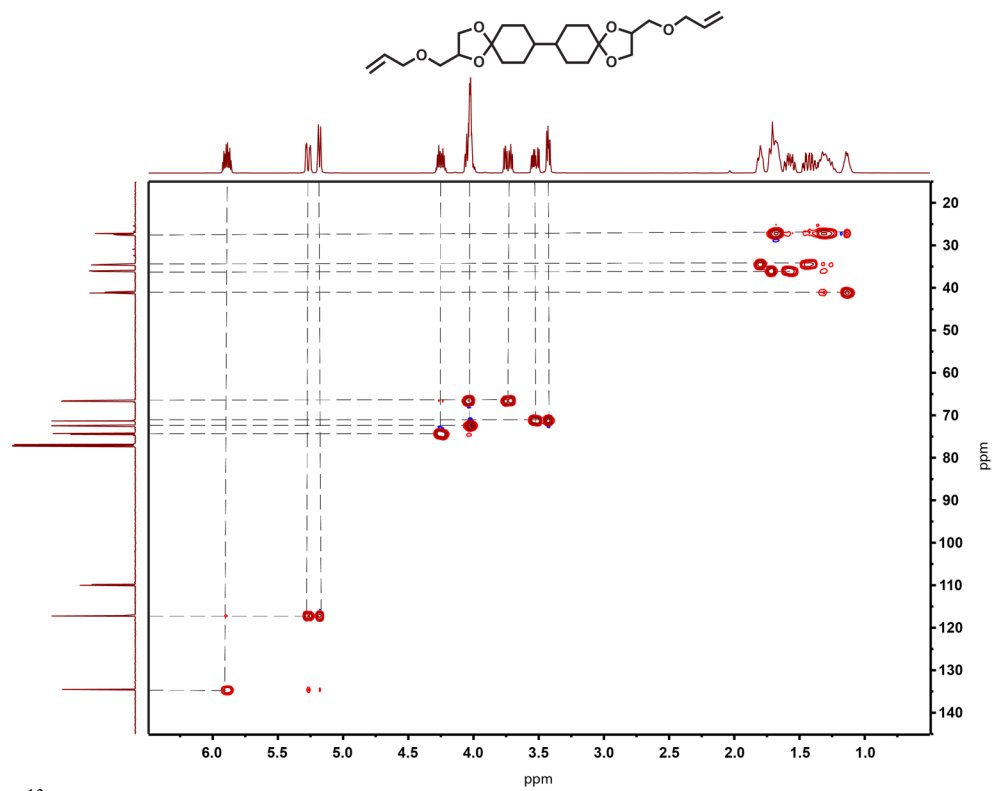

Fig. S7.  $^1\text{H}$ - $^{13}\text{C}$  HSQC Spectrum of Monomer 5.

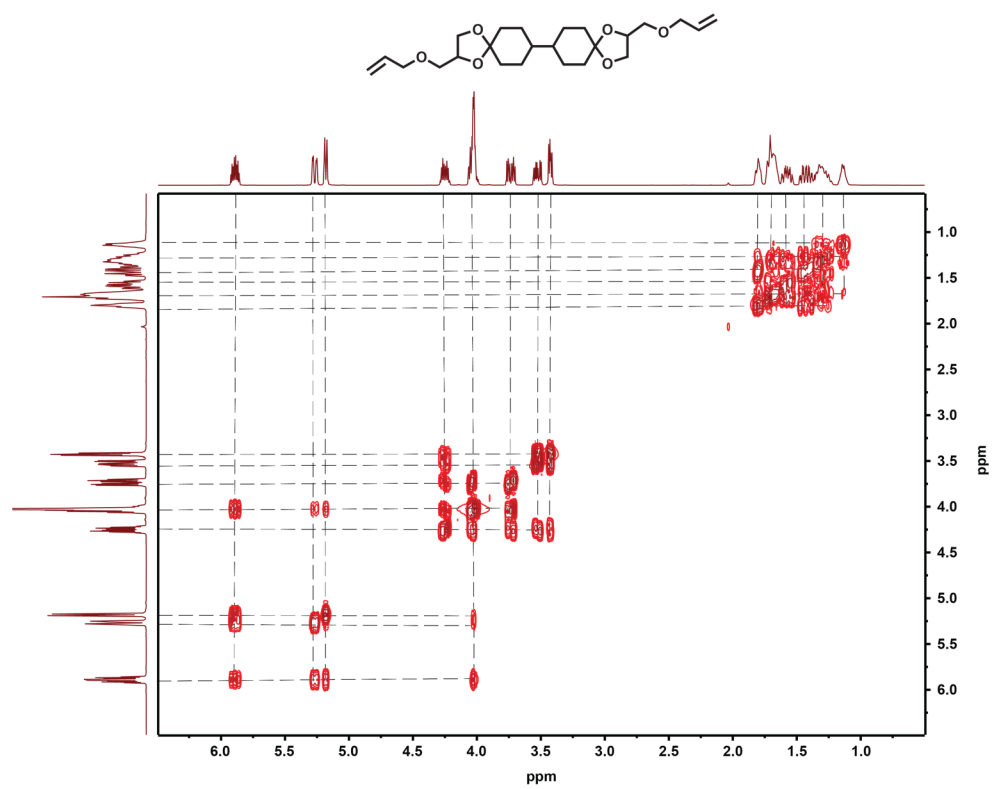

Fig. S8. COSY Spectrum of Monomer 5.

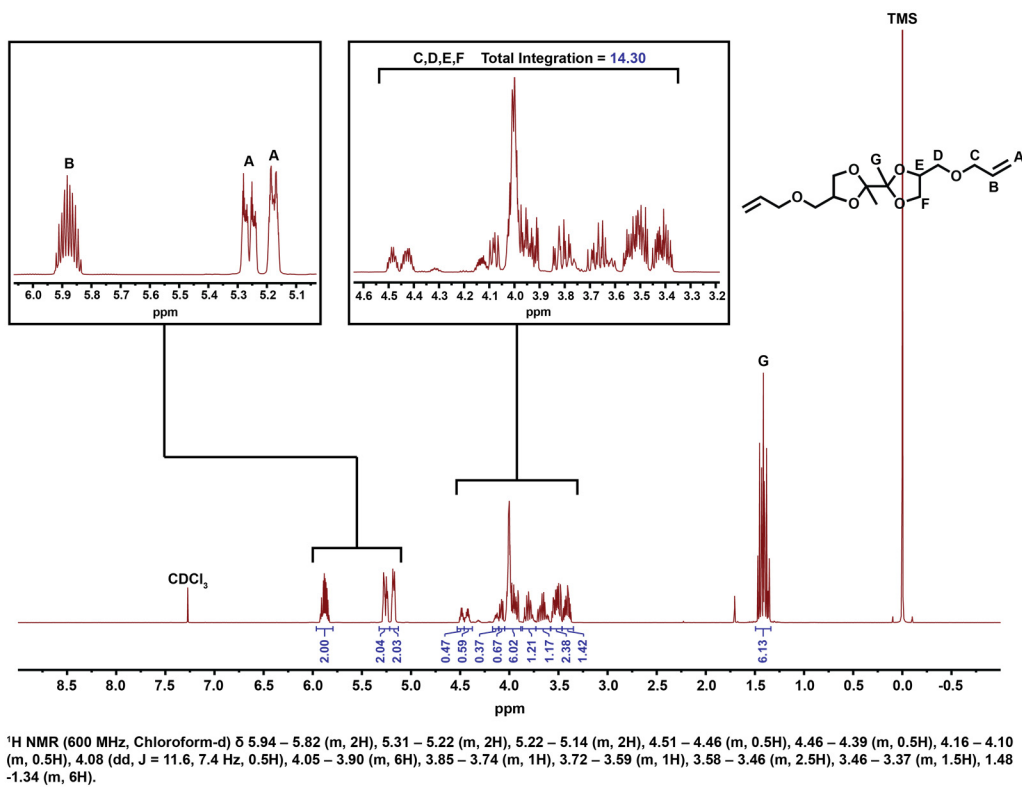

Fig. S9. <sup>1</sup>H-NMR Spectrum of Monomer 7.

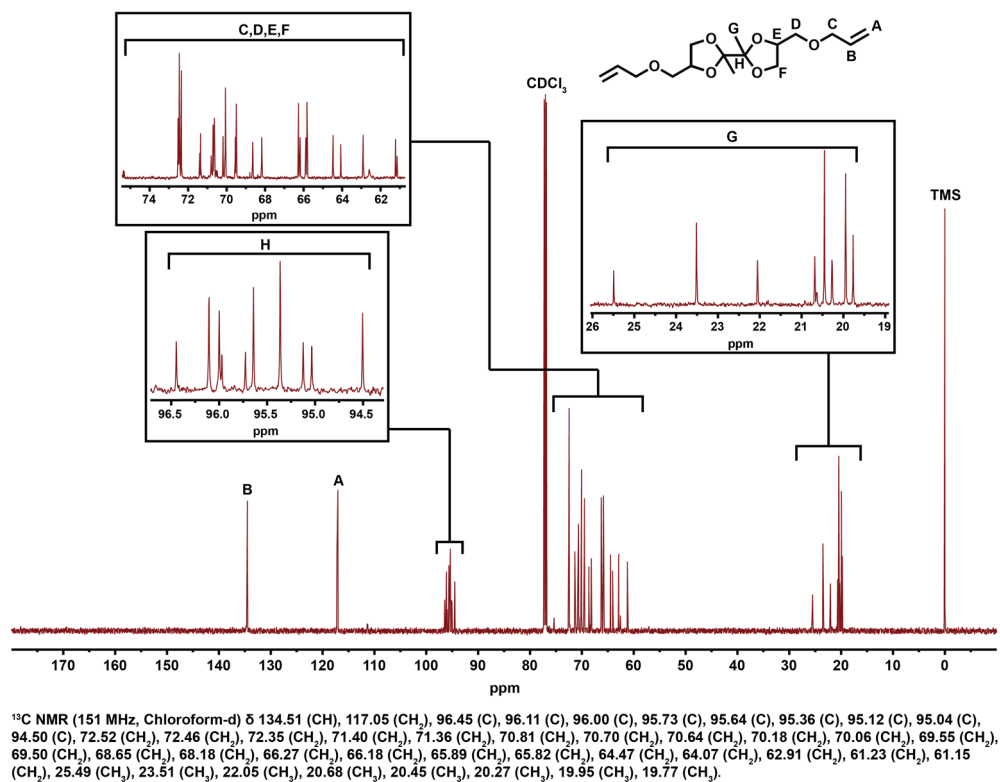

Fig. S10. <sup>13</sup>C-NMR Spectrum of Monomer 7.

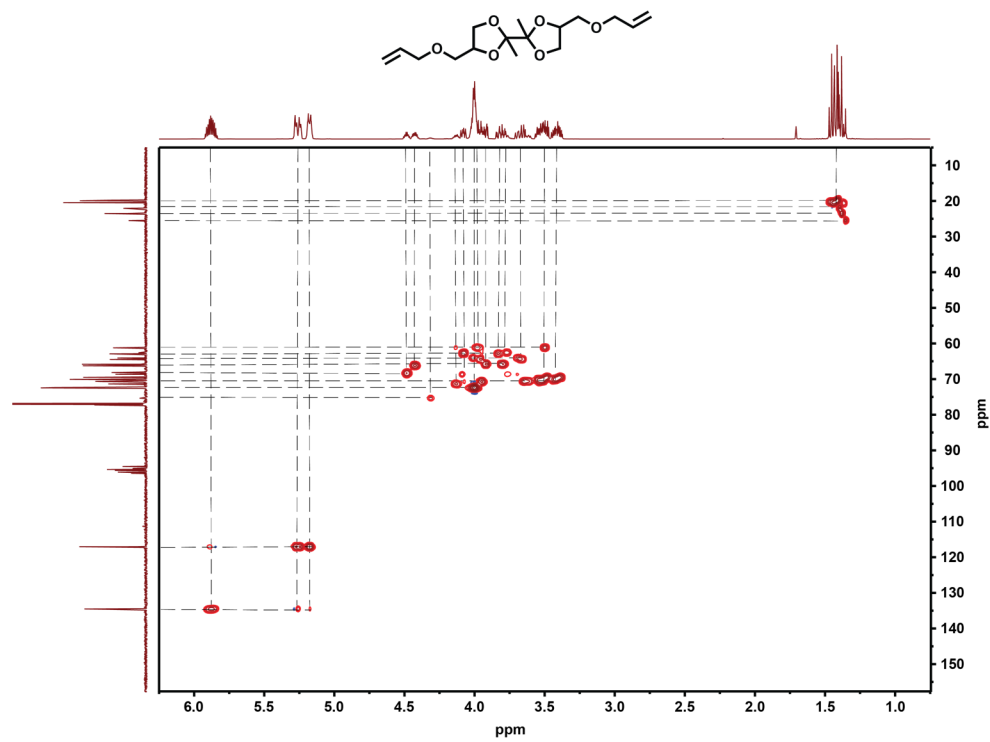

Fig. S11.  $^1\text{H}$  -  $^{13}\text{C}$  HSQC Spectrum of Monomer 7.

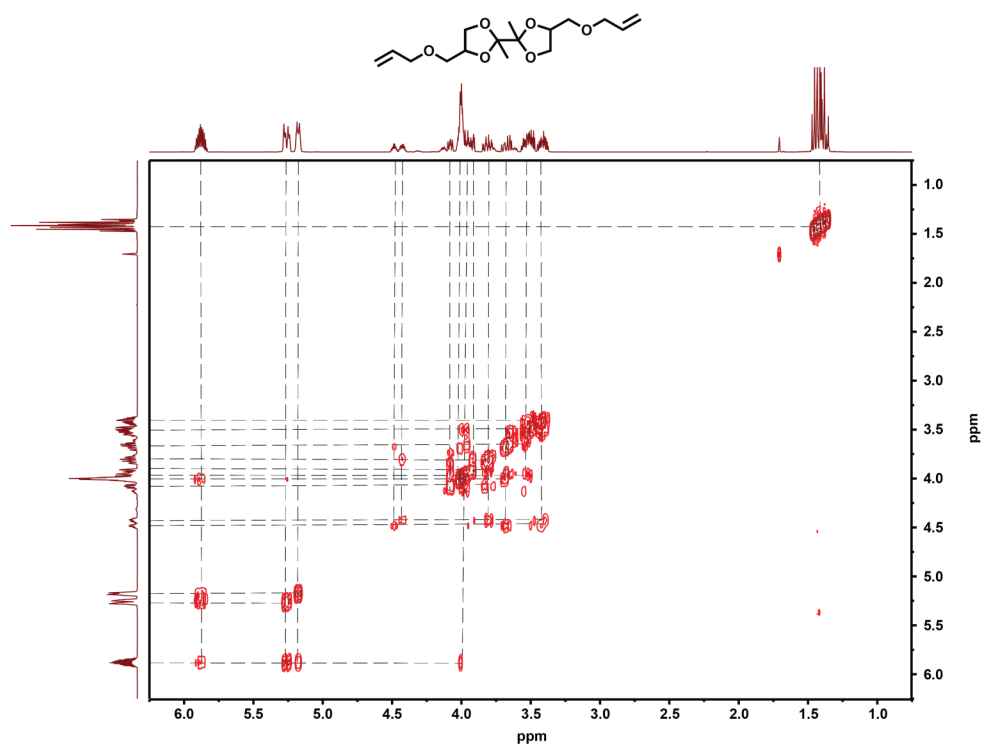

Fig. S12. COSY Spectrum of Monomer 7.

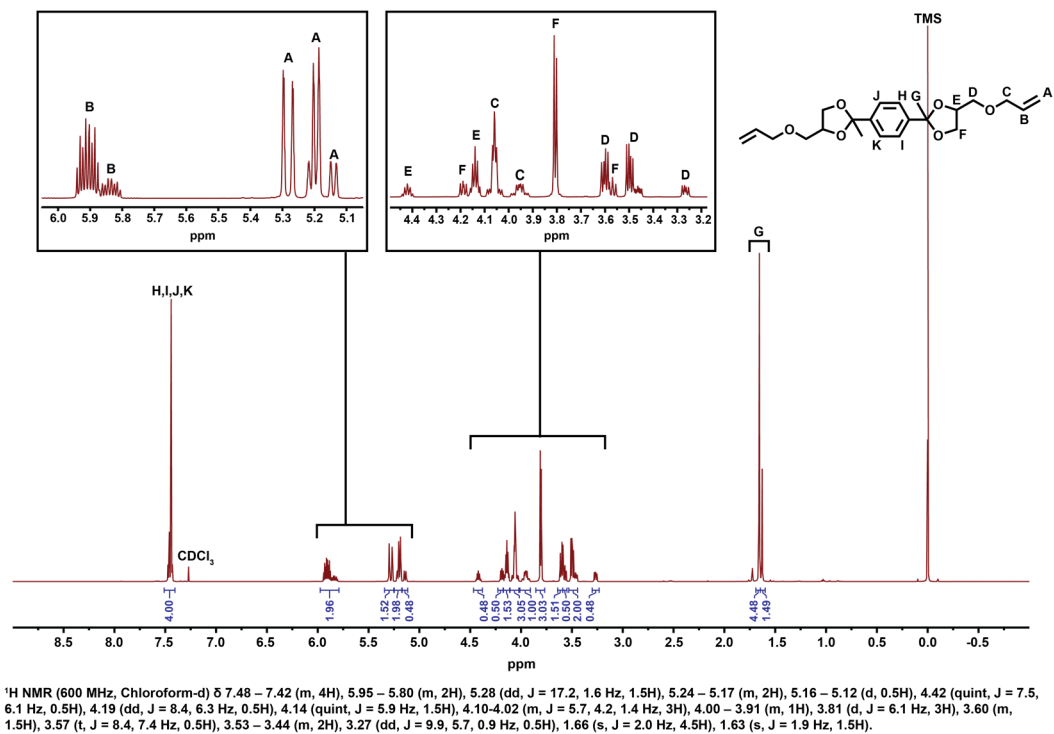

Fig. S13. <sup>1</sup>H-NMR Spectrum of Monomer 9.

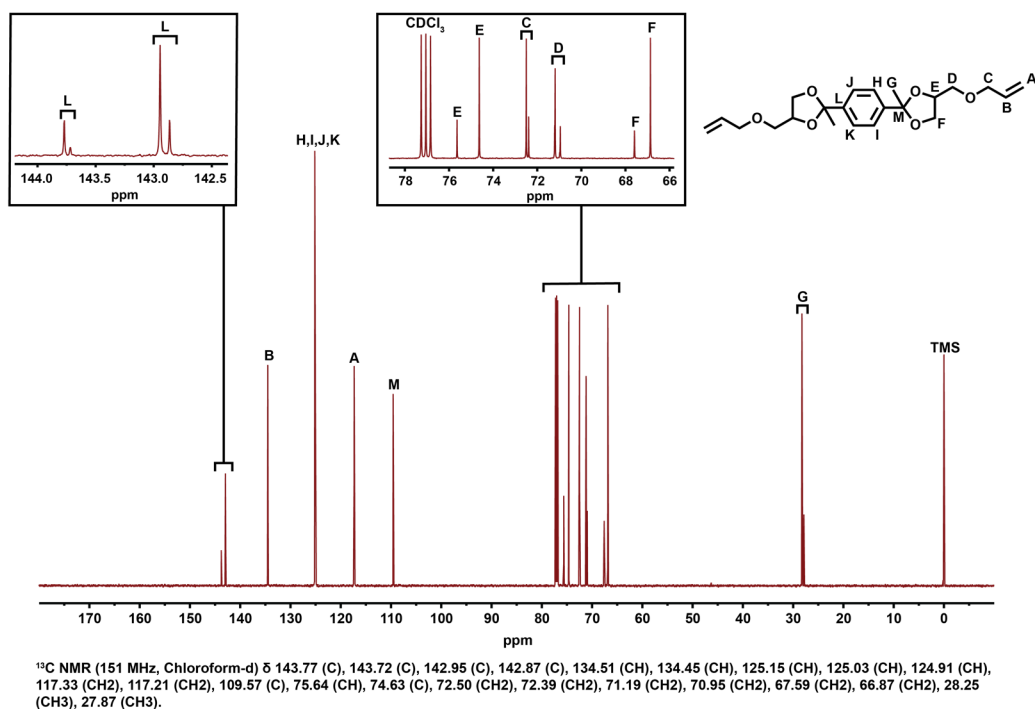

Fig. S14. <sup>13</sup>C-NMR Spectrum of Monomer 9.



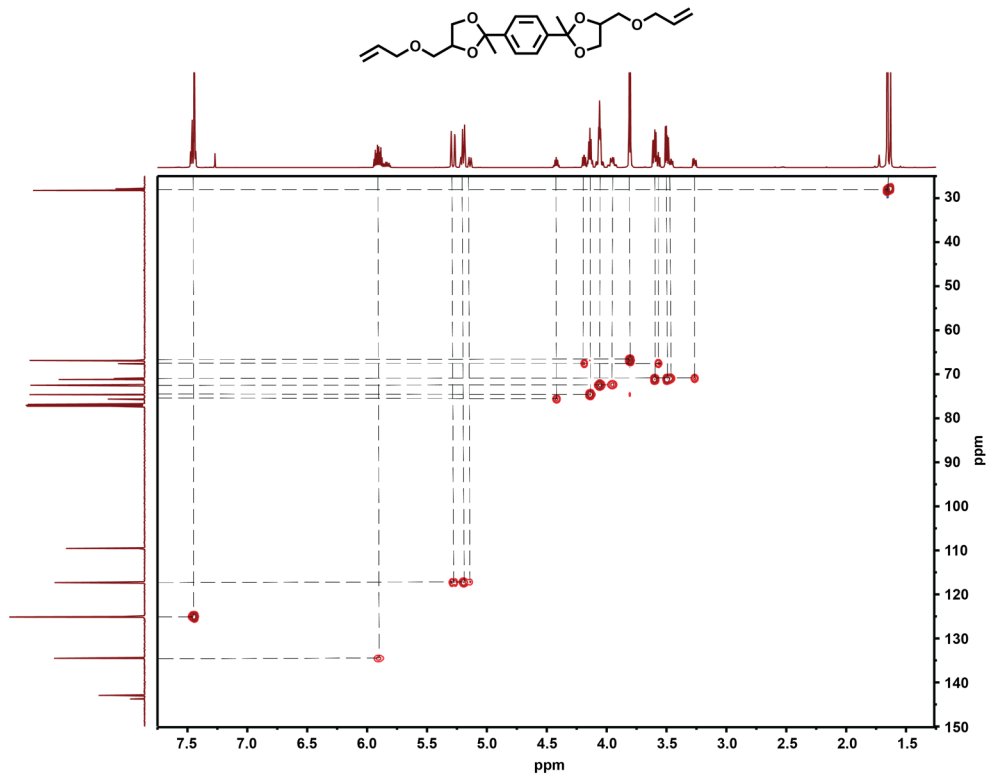

Fig. S15.  $^1\text{H}$  -  $^{13}\text{C}$  HSQC Spectrum of Monomer **9**.

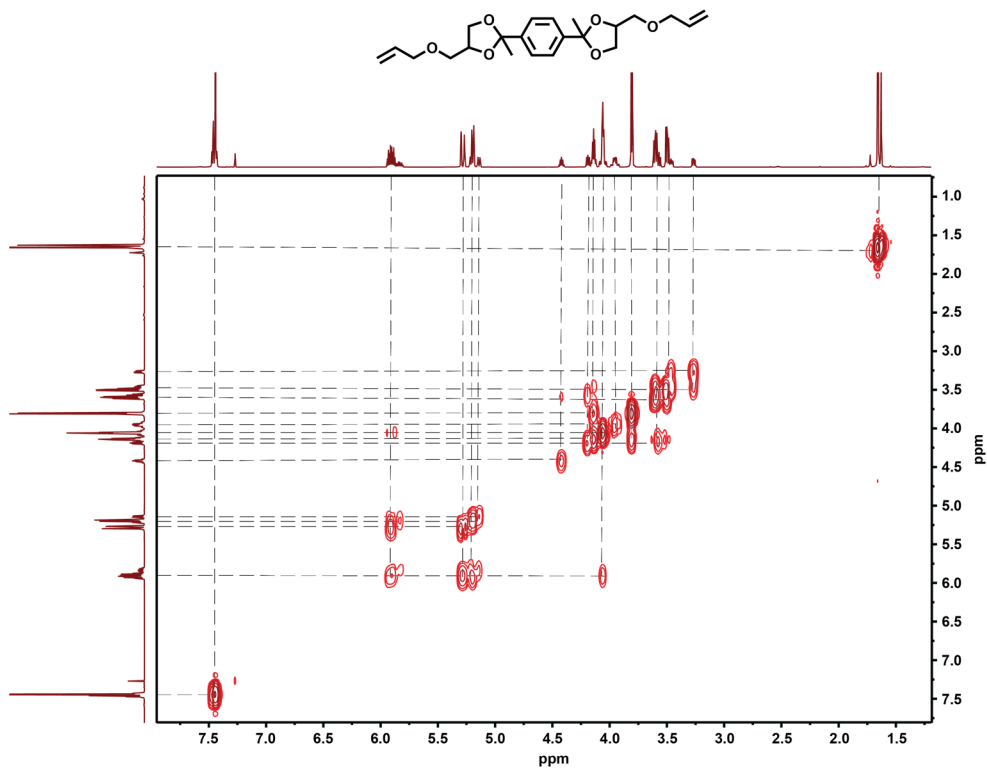

Fig. S16. COSY Spectrum of Monomer **9**.

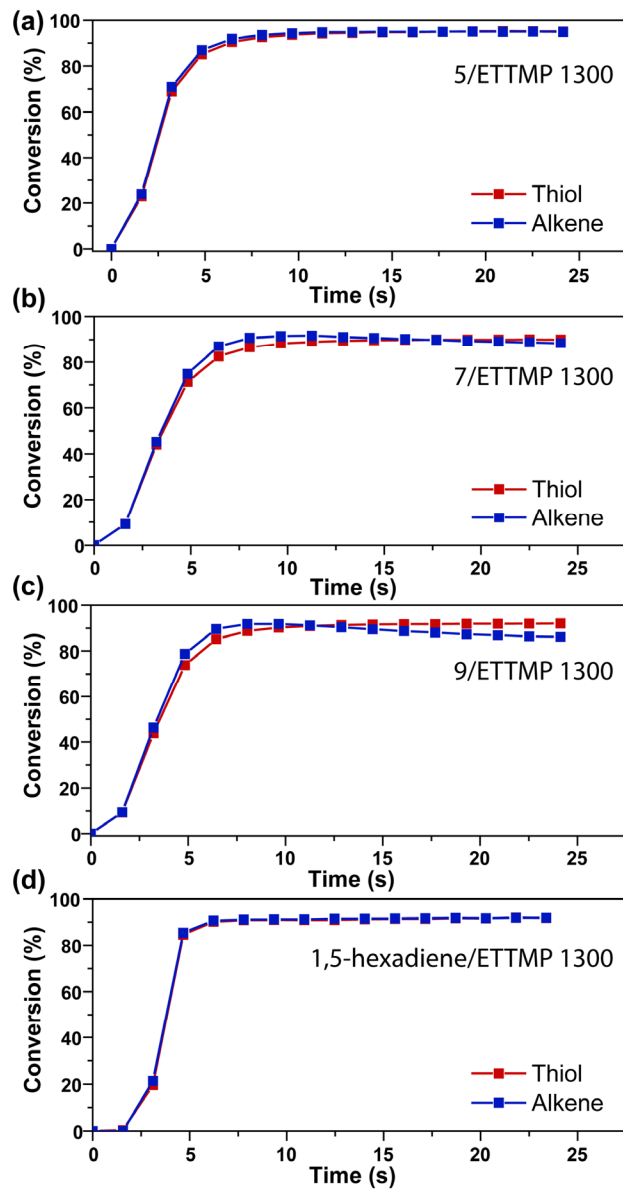

**Fig. S17.** Experiments resulted in respectable conversions of 94%, 95%, and 92% for thermosets 1a, 1b (a) and 1,5-hexadiene (d) respectively, while compositions based on 1c and 1d showed conversions of 91% (b,c).

### Acidic degradation product analysis for P9

Experimental procedure: 900mg of P9 was degraded in 20 mL HCl/H<sub>2</sub>O (pH 0.2) over the course of 12 h. Fine white crystals formed in the degradation solution. The crystals were washed with DI H<sub>2</sub>O and ethanol and set aside for analysis. The remaining degradation solution was extracted 2x with chloroform, dried with sodium sulfate and vacuumed to yield a clear viscous oil. The crystals and viscous oil products were analyzed by <sup>1</sup>H-NMR and were confirmed as 1,4-diacetylbenzene (fine white crystals) and a multifunctional alcohol (clear viscous oil). Both products confirmed ketal hydrolysis to be the main mechanism of degradation for P9.

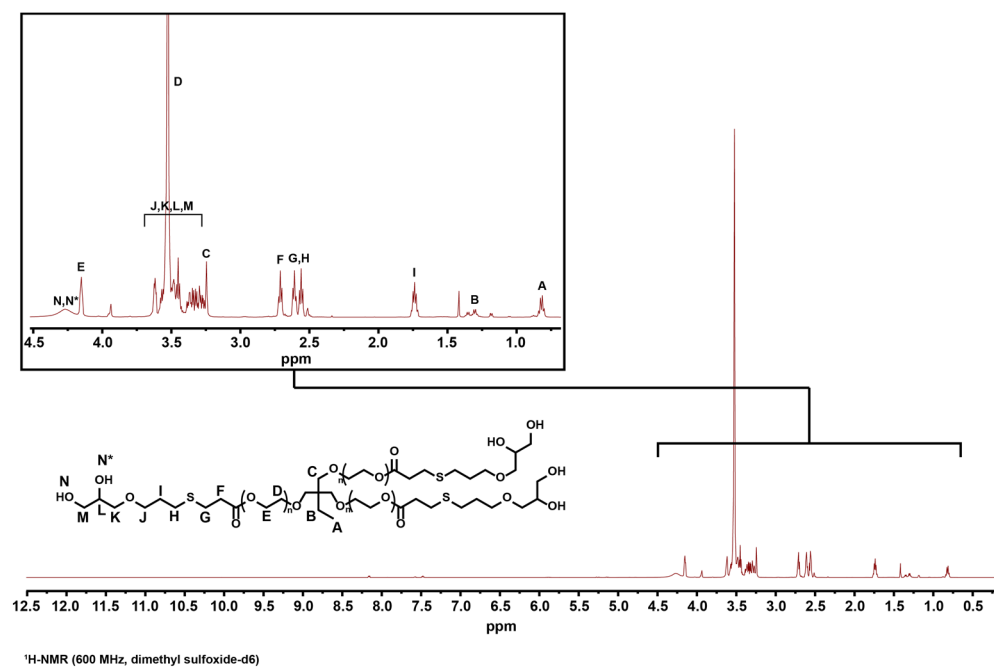

**Fig S18.** <sup>1</sup>H-NMR spectrum of water-soluble P9 degradation by-products obtained under acidic conditions (pH 0.2).

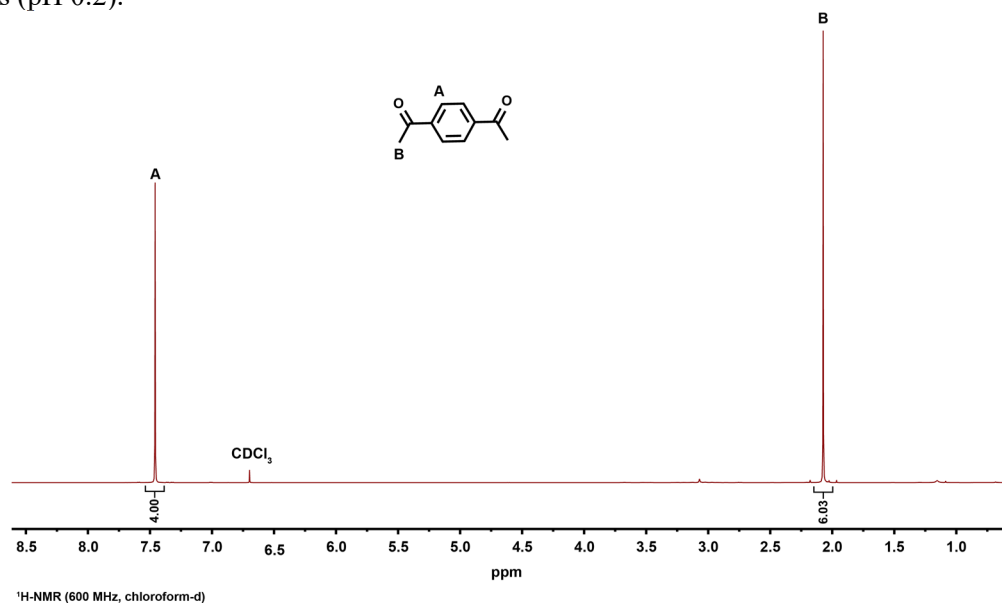

**Fig S19.** <sup>1</sup>H-NMR spectrum of water-insoluble P9 degradation by-products obtained under acidic conditions (pH 0.2).

### Basic degradation product analysis for P9

Experimental procedure: 900mg of P9 was degraded in 20 mL of NaOH/H<sub>2</sub>O (pH 13.5) over 10 h. No precipitates or crystals were observed to form. The remaining degradation solution was neutralized with HCl/H<sub>2</sub>O solution before being extracted 2x with chloroform, dried with sodium sulfate and vacuumed to yield a clear viscous oil. <sup>1</sup>H-NMR confirmed the products to be trimethylol propane ethoxylate and a carboxylic acid end-functionalized ketal crosslinker. Both products confirmed ester hydrolysis to be the main mechanism of degradation for P9.

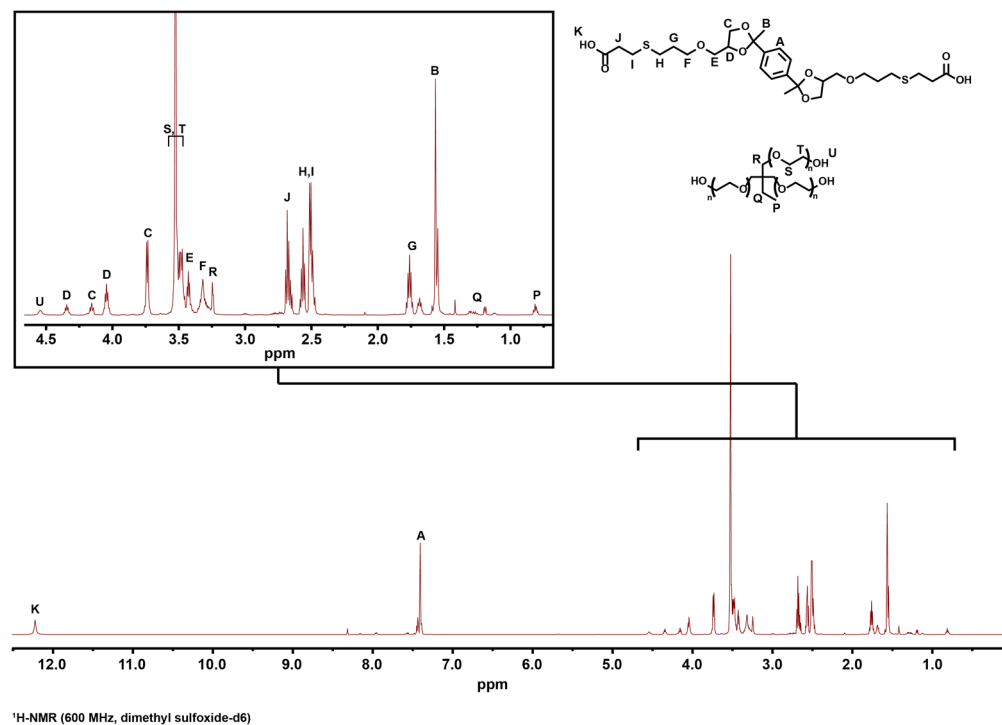

Fig S20. <sup>1</sup>H-NMR spectrum of P9 degradation by-products obtained under basic conditions (pH 13.5).

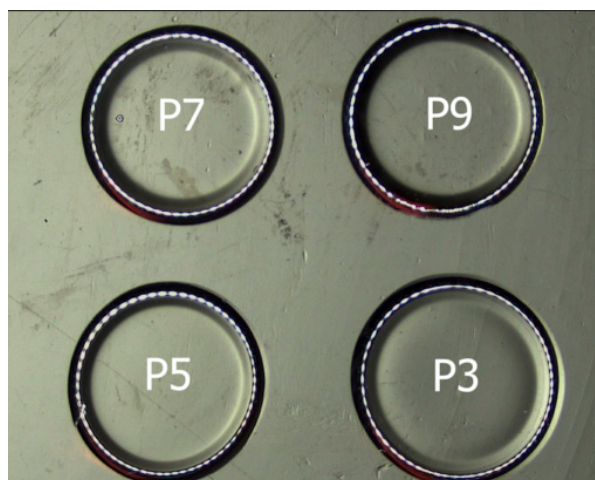

Video S1. Degradation of poly( $\beta$ -thioether ester ketal) thermosets P3, P5, P7, at pH 0.88 (HCl/H<sub>2</sub>O). Full length video is 17h presented at approximately 1500x speed. Note: Thermoset disk size for video capture was based on 5 $\mu$ L droplets prior to photopolymerization. This disk size is much smaller than samples employed in mass loss experiments.
